# Supplementary material for: Lnk constrains myeloproliferative diseases in mice
Source: JCI journal article supplement (doi:10.1172/jci42032), 2010-05-10

## **Lnk Constrains Myeloproliferative Diseases in Mice**

Alexey Bersenev<sup>2</sup>, Chao Wu<sup>2</sup>, Joanna Balcerek<sup>2</sup>, Jiang Jing<sup>2</sup>, Mondira Kundu<sup>3</sup>, Gerd A. Blobel<sup>1,2</sup>, Kudakwashe R. Chikwava<sup>4</sup>, and Wei Tong<sup>1,2,5</sup>

### **Supplemental Figures:**

**Figure 1S. Viral infection rates of Lin<sup>-</sup> progenitor cells.** GFP expression was examined two days after viral infection of Lin<sup>-</sup> progenitors. WT and Lnk<sup>-/-</sup> cells infected with retroviruses encoding either MIG vector alone or Tel/JAK2 show similar infection frequencies.

**Figure 2S: Lnk deficiency leads to an expansion of immature myeloid cells in the transplanted mice expressing Tel/JAK2.** **A)** shows Wrights-Giemsa staining of BM cytopins from WT;Tel/JAK2 and Lnk<sup>-/-</sup>;Tel/JAK2 mice. As reference, **B)** shows Wrights-Giemsa staining of cytopins from purified WT BM cells. Majority of Gr-1<sup>+</sup>Mac-1<sup>+</sup> cells assume mature granulocytic morphology, while Gr-1<sup>-/low</sup>Mac-1<sup>+</sup> cells appear to be immature myeloid cells. Magnification: 600x.

**Figure 3S: WT Lnk ameliorates CML development in Lnk<sup>-/-</sup> mice expressing Tel/JAK2.** Lnk<sup>-/-</sup> progenitor cells were infected with retroviruses encoding either Tel/JAK2 or Tel/JAK2-Lnk, and transplanted into irradiated recipients. **A)** Viral infection rates two days post transduction are shown on the left panels. Myeloid chimerisms of

reconstituted mice at indicated time points post transplantation are shown on the right panels. **B)** Survival curves of reconstituted mice.

**Figure 4S: The addition of Y813F mutation in JAK2V617F ablates its Lnk binding ability.** 293T cells were transfected with Flag-tagged Lnk and various JAK2 constructs. Cell lysates were immunoprecipitated (IP) with anti-Flag antibodies followed with Western blot (WB) with anti-JAK2 and Lnk antibodies sequentially. Total cell lysates (TCL) were also directly subjected to WB analysis with anti-JAK2 antibodies. wt: wild type; VF: JAK2V617F; VF/YF: JAK2V617F/Y813F.

**Figure 5S. Lnk deficiency exacerbates CML development initiated by Bcr/Abl in mice.** WT and Lnk<sup>-/-</sup> BM cells were infected with retroviruses encoding either MIG vector alone or Bcr/Abl, and transplanted to irradiated host animals. Kaplan-Meier survival analysis (left) and blood count of transplanted mice (right) are shown. The box plot shows total neutrophil counts measured 2 weeks after the transplant. The ends of the boxes define the 25<sup>th</sup> and 75<sup>th</sup> percentiles, a line indicates the median, and bars define the 5<sup>th</sup> and 95<sup>th</sup> percentiles. N=5. p<0.01 comparing WT;Bcr/Abl and Lnk<sup>-/-</sup>;Bcr/Abl groups.

Supplemental Figure 1S:

## Viral infection rate

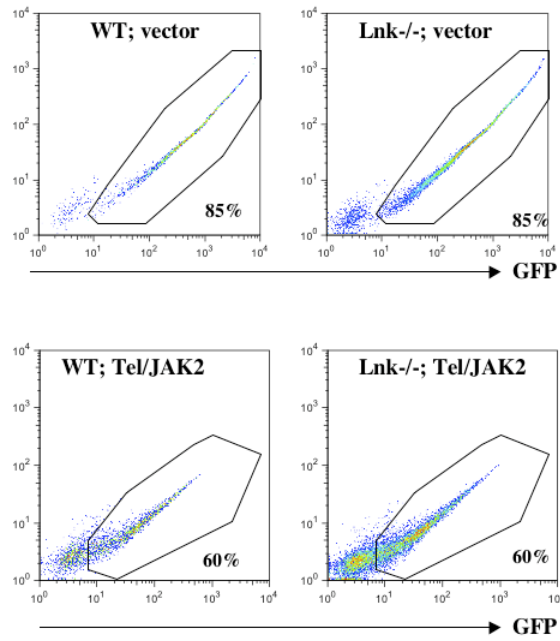

Supplemental Figure 2S:

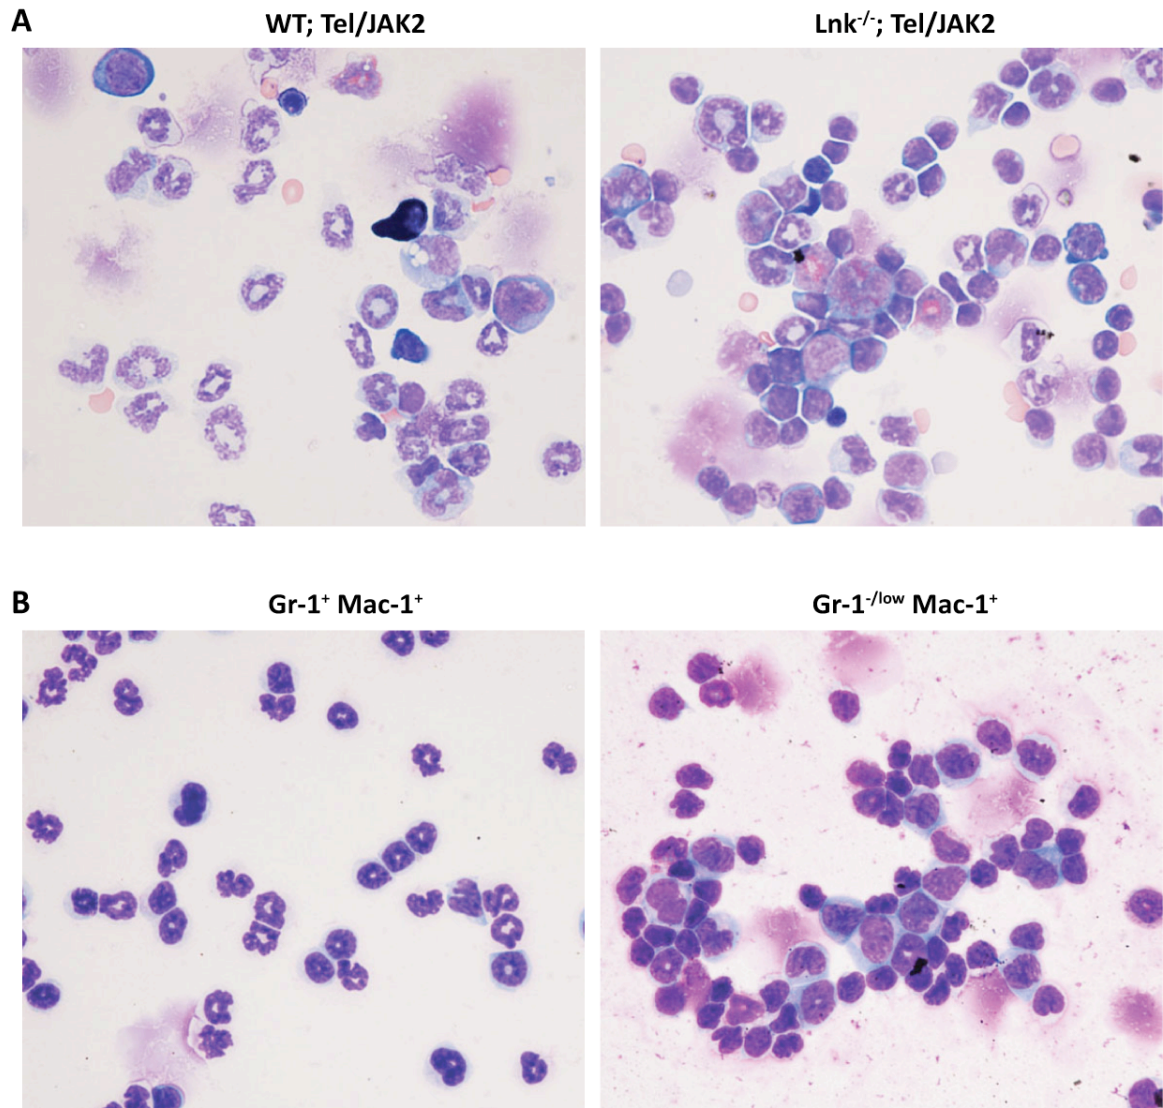

**Supplemental Figure 3S:**

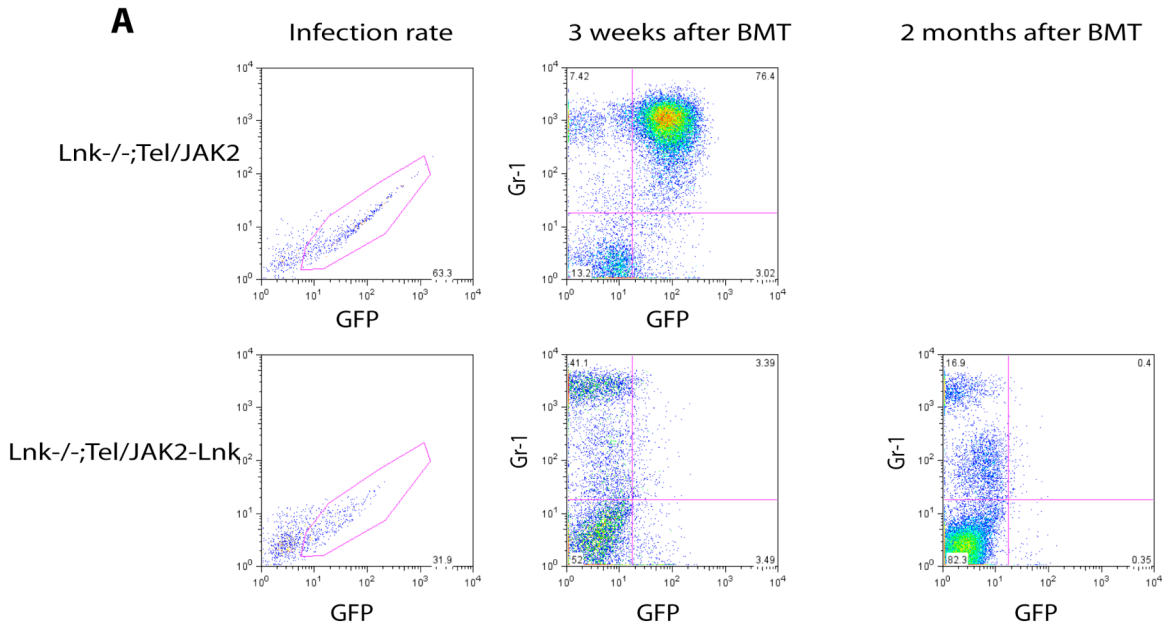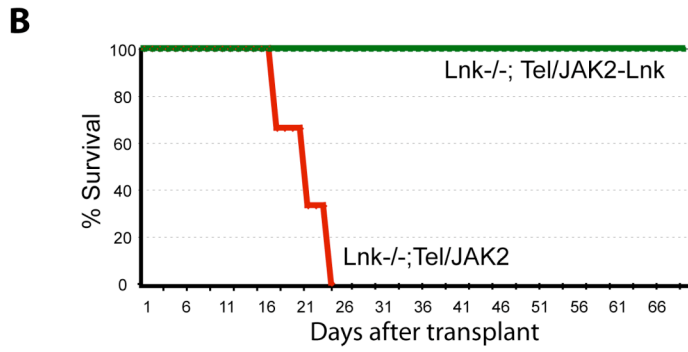

**Supplemental Figure 4S:**

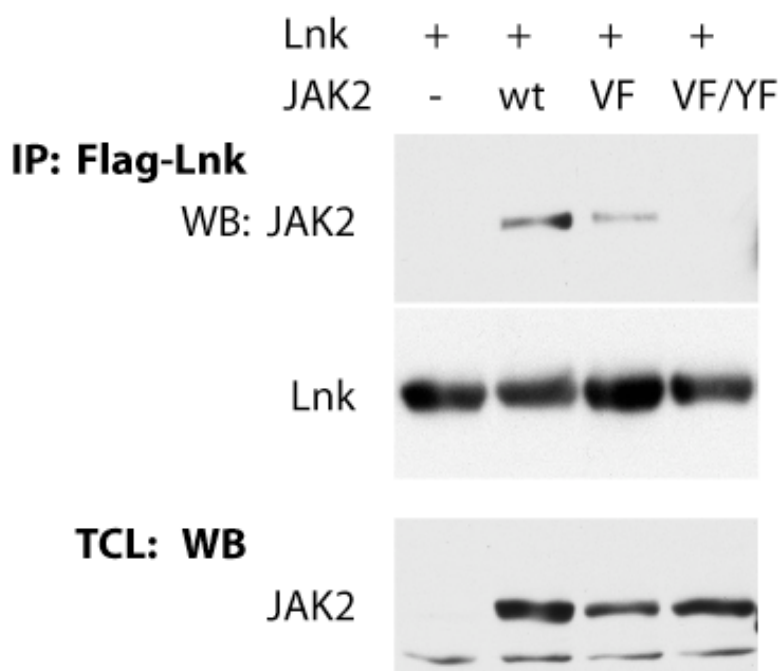

Supplemental Figure 5S:

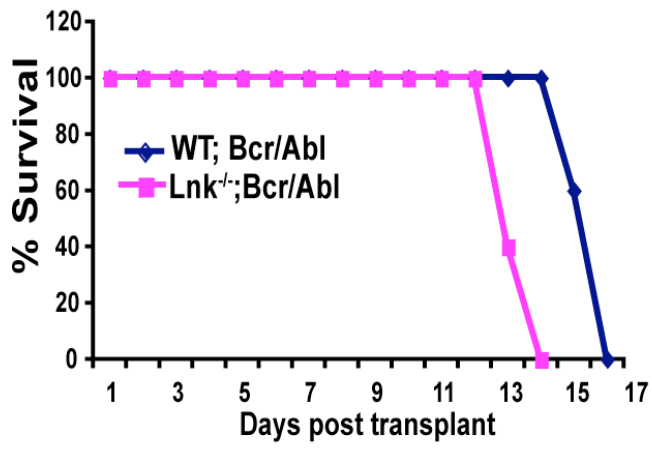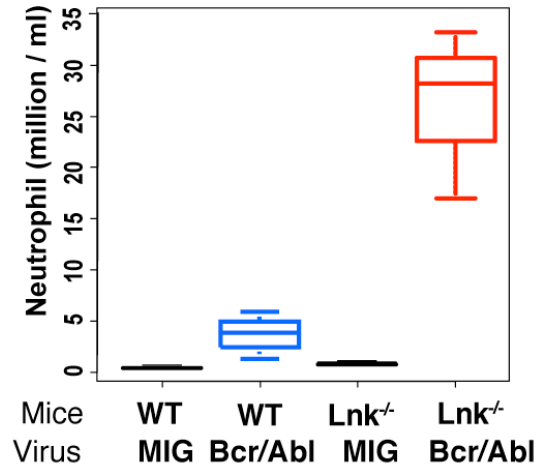

Supplement: sd1 [file 1]
